# Supplementary material for: A nuclear-replicating viroid antagonizes infectivity and accumulation of a geminivirus by upregulating methylation-related genes and inducing hypermethylation of viral DNA
Source: PubMed Central journal article supplement (PMC5064398; doi:10.1038/srep35101), 2016-10-14
Supplement: srep35101-s1.pdf [file srep35101-s1.pdf]

## SUPPLEMENTARY INFORMATION FOR

A nuclear-replicating viroid antagonizes infectivity and accumulation of a geminivirus by upregulating methylation-related genes and inducing hypermethylation of viral DNA

EM Torchetti, M Pegoraro, B Navarro, M Catoni, F Di Serio, E Noris

**Supplementary Table S1.** Expression of the housekeeping gene Ubiquiting Conjugating enzyme in the different experimental conditions.

| Mean Threshold Cycles (Ct) |        |        |                  | Significativity |
|----------------------------|--------|--------|------------------|-----------------|
| Non Infected               | TYLCSV | PSTVd  | TYLCSV/<br>PSTVd |                 |
| 24.926                     | 26.132 | 23.633 | 24.004           | 0.076           |
| 25.083                     | 26.574 | 25.191 | 23.984           |                 |
| 25.050                     | 24.541 | 24.295 | 24.263           |                 |

Analysis of variance (ANOVA) of the Mean Ct values obtained from three biological replicates per treatment, each with three technical replicates.

**Supplementary Table S2.** P-values of the fold changes of gene expression calculated for each experimental conditions.

| <b>Tomato gene</b> | <b>TYLCSV vs.<br/>mixed infection</b> | <b>TYLCSV vs.<br/>PSTVd</b> | <b>PSTVd vs.<br/>mixed infection</b> |
|--------------------|---------------------------------------|-----------------------------|--------------------------------------|
| MET1               | 0.010                                 | 0.024                       | 0.446                                |
| CMT3               | 0.006                                 | 0.019                       | 0.488                                |
| DDM1               | 0.009                                 | 0.023                       | 0.500                                |
| KYP                | 0.025                                 | 0.050                       | 0.527                                |
| IBM1               | 0.044                                 | 0.063                       | 0.476                                |
| DRM2               | 0.020                                 | 0.050                       | 0.896                                |
| NRPD1              | 0.018                                 | 0.073                       | 0.816                                |
| NRPE1              | 0.018                                 | 0.037                       | 0.367                                |
| HEN1               | 0.018                                 | 0.048                       | 0.211                                |
| AGO4a              | 0.019                                 | 0.038                       | 0.767                                |
| ADK                | 0.026                                 | 0.060                       | 0.633                                |
| SAHH               | 0.027                                 | 0.033                       | 0.711                                |
| SAMS               | 0.035                                 | 0.050                       | 0.581                                |
| SAMDC1             | 0.008                                 | 0.009                       | 0.879                                |
| ROS1               | 0.015                                 | 0.021                       | 0.910                                |

**Supplementary Table S3.** P-values of the percentage of methylated cytosines in the TYLCSV region analyzed, calculated for the total cytosines and for each cytosine context.

| <b>Cytosine context</b> | <b>TYLCSV vs. mixed infection</b> |
|-------------------------|-----------------------------------|
| <b>Total</b>            | 1.92 E-08                         |
| <b>CHH</b>              | 2.13 E-09                         |
| <b>CHG</b>              | 1.81 E-07                         |
| <b>CG</b>               | 2.42 E-06                         |



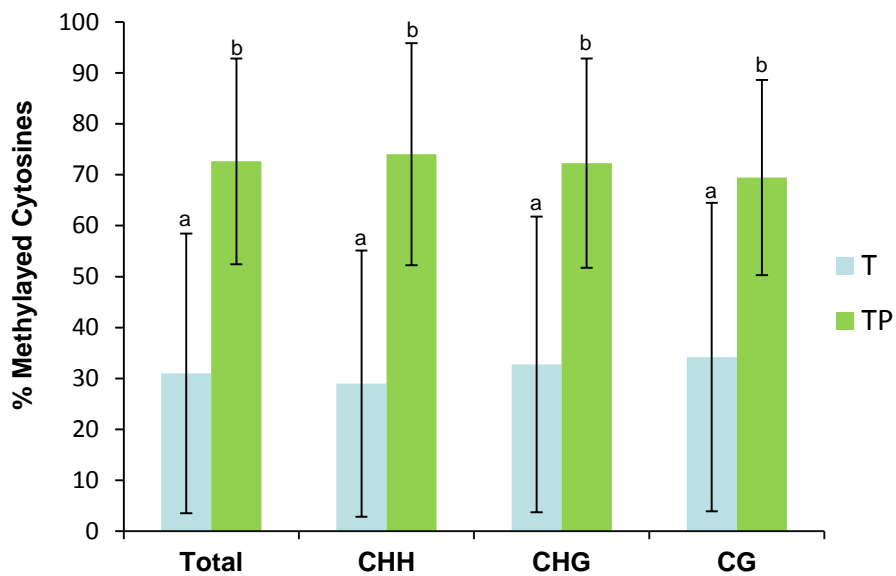

**Supplementary Figure S2.** Bisulfite sequencing analysis of TYLCSV genome methylation in tomato plants infected by TYLCSV alone (T) or doubly infected by TYLCSV and PSTVd (TP). Columns represent mean percentage of methylated cytosines in the TYLCSV region analyzed independently from the DNA context (Total) or taking into consideration the CHH, CHG and CG contexts. Bars, standard deviation; letters, statistical significance ( $P \leq 0.0001$ ; Student t-test).
